# Supplementary material
Source: PubMed Central journal article supplement (PMC6231073)

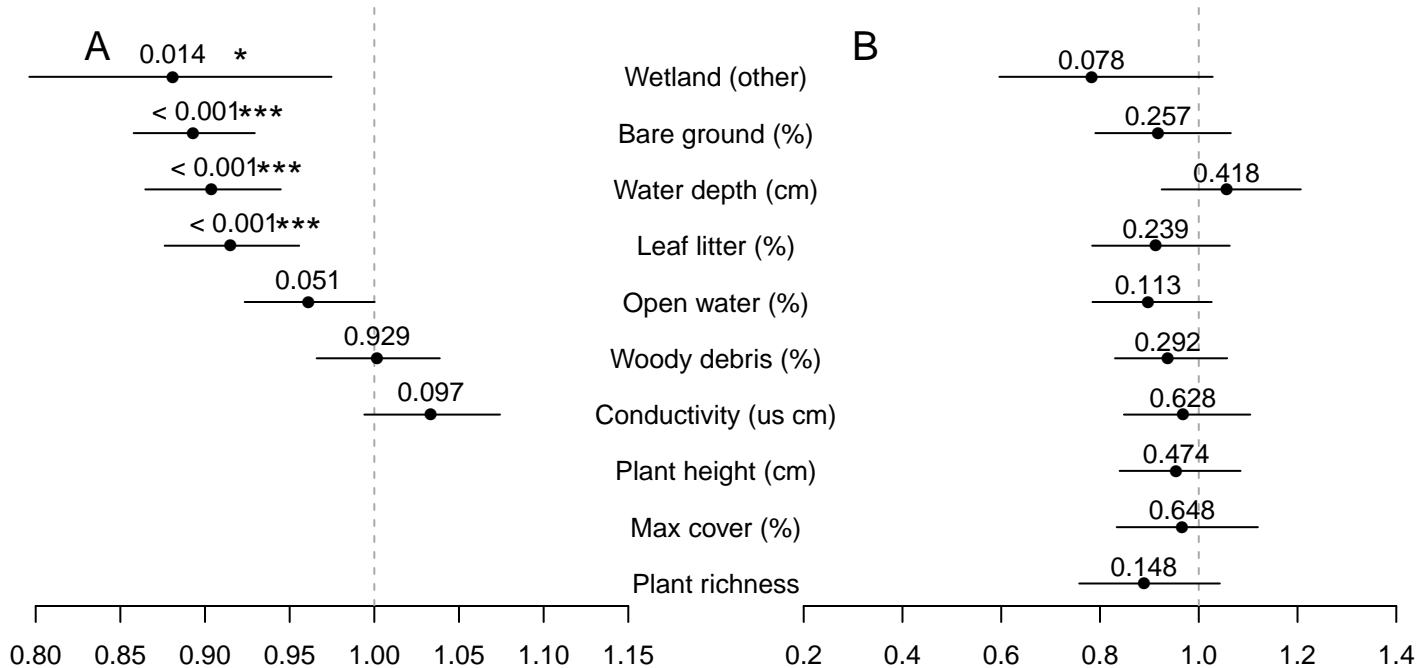

Supplement: rstb20170444supp2.pdf [file rstb20170444supp2.pdf]
